# Supplementary material
Source: Springer Nature journal article supplement (https://www.springermedizin.de/resource/supplementary/12889_2014_7114_MOESM5_ESM.pdf/9499886)
Supplement: MOESM5 [file 9499886]

1 **Table 3 Regressing SAHL-D scores on educational level, demographic and literacy**  
 2 **variables (standardized B; 95%CI)**

|                                            | <b>Model 1</b>             | <b>Model 2</b>                | <b>Model 3</b>              | <b>Model 4</b>             | <b>Model 5</b>             |
|--------------------------------------------|----------------------------|-------------------------------|-----------------------------|----------------------------|----------------------------|
| Prose literacy                             | <b>1.01</b><br>0.80 / 1.22 |                               |                             |                            |                            |
| Vocabulary                                 |                            | <b>0.71</b><br>0.61 / 0.82    |                             |                            |                            |
| Objective HL<br>(NVS-D)                    |                            |                               | <b>1.80</b><br>1.36 / 2.23  |                            |                            |
| Subjective HL<br>(HLS-EU)                  |                            |                               |                             | 0.09<br>-0.03 / 0.21       |                            |
| Middle<br>education level<br>(ref=low)     | <b>1.74</b><br>0.08 / 3.74 | 1.21<br>-0.30 / 2.71          | <b>1.20</b><br>-0.53 / 2.92 | <b>3.11</b><br>0.82 / 5.40 | <b>2.07</b><br>0.15 / 3.99 |
| High education<br>level<br>(ref=low)       | <b>4.64</b><br>2.82 / 6.46 | <b>3.53</b><br>1.87 / 5.20    | <b>4.95</b><br>3.07 / 6.83  | <b>7.71</b><br>5.42 / 9.99 | <b>7.48</b><br>5.49 / 9.47 |
| Age                                        | <b>0.08</b><br>0.03 / 0.13 | <b>-0.05</b><br>-0.09 / -0.01 | <b>0.11</b><br>0.06 / 0.16  | 0.00<br>-0.07 / 0.06       | 0.04<br>-0.01 / 0.09       |
| Gender                                     | <b>2.57</b><br>1.19 / 3.95 | <b>3.65</b><br>2.40 / 4.90    | <b>1.95</b><br>0.51 / 3.39  | <b>2.48</b><br>0.49 / 4.47 | <b>2.88</b><br>1.29 / 4.47 |
| Worked in<br>health care in<br>(ref=never) | 0.74<br>-1.01 / 2.49       | 1.24<br>-0.34 / 2.82          | 1.33<br>-0.47 / 3.15        | <b>2.51</b><br>0.14 / 4.88 | 1.03<br>-0.99 / 3.06       |
| Now works in<br>health care<br>(ref=never) | <b>4.13</b><br>2.30 / 5.96 | <b>3.35</b><br>1.69 / 5.01    | <b>3.76</b><br>1.86 / 5.65  | <b>4.06</b><br>1.64 / 6.48 | <b>4.48</b><br>2.37 / 6.59 |
| Adjusted R <sup>2</sup><br>(SE)            | 0.444 (5.16)               | 0.548 (4.65)                  | 0.406 (5.33)                | 0.332 (5.52)               | 0.257 (5.96)               |

3 [Significant differences (p<0.05) are presented in bold]  
 4
